# Supplementary material for: SNS01-T Modulation of eIF5A Inhibits B-cell Cancer Progression and Synergizes With Bortezomib and Lenalidomide
Source: PubMed Central journal article supplement — Mol Ther. 2014 Apr 1;22(9):1643–52. doi: 10.1038/mt.2014.24 (PMC4435495; doi:10.1038/mt.2014.24), 2014-04-01
Supplement: mt201424x1.pdf [file mt201424x1.pdf]

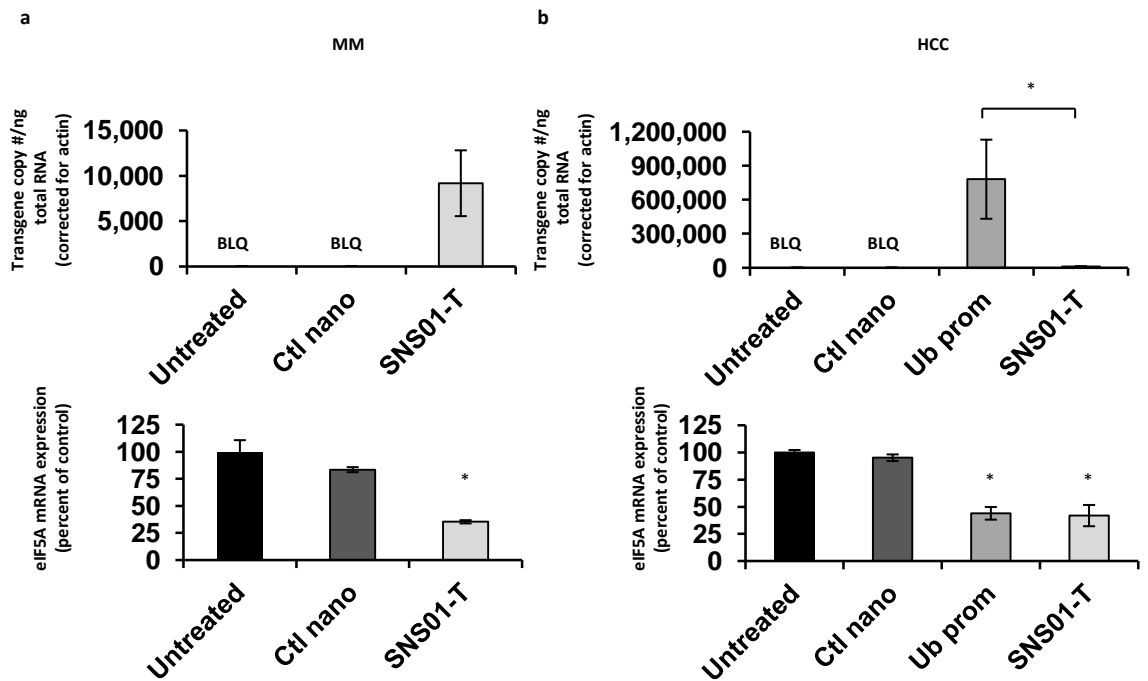

**Figure S1. SNS01-T plasmid activity is specific to B-cells.** (a) KAS-6/1 cells were transfected with control nanoparticles (Ctl nano), SNS01-T, or were left untreated and (b), Hep3B-βhCG-C4 cells were transfected with a control nanoparticle, a nanoparticle containing an eIF5A<sub>K50R</sub> plasmid driven by the ubiquitous EF-1 promoter (Ub prom), SNS01-T, or were left untreated for 24 hours. Biological activity was assessed by RT-qPCR. Transgene copy number reflects plasmid activity while suppression of eIF5A mRNA expression reflects siRNA activity. The data indicate the mean  $\pm$  s.e.m.; asterisks indicate statistically significant differences (Student's *t*-test;  $n=3$ ,  $P$  value  $< 0.05$ ). MM, multiple myeloma, HCC, hepatocellular carcinoma, BLQ, below limit of quantification.

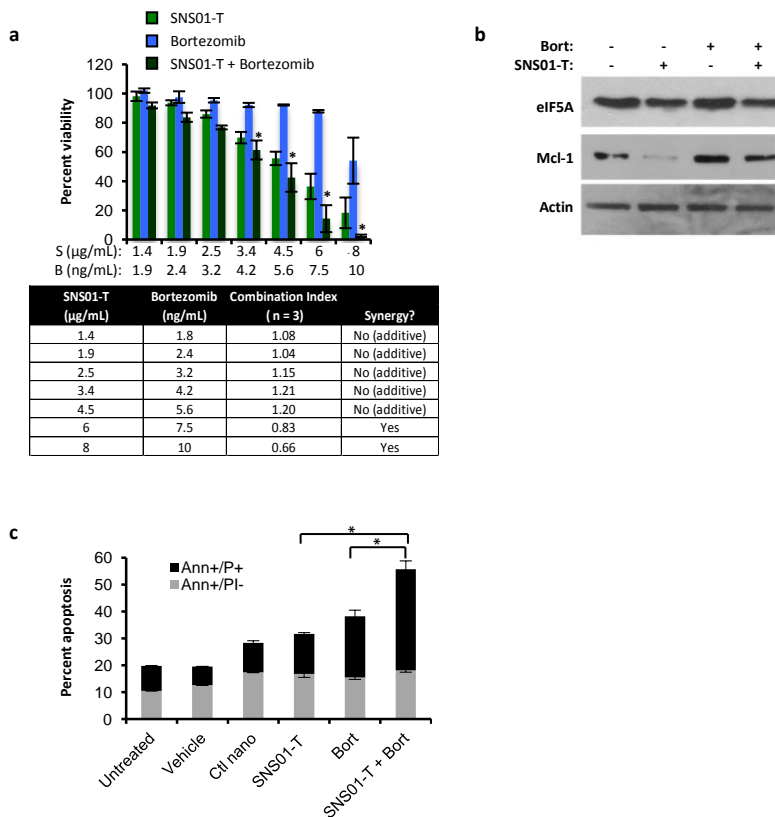

**Figure S2. SNS01-T and bortezomib synergize in KAS-6/1 cells.** (a) KAS-6/1 cells were treated with increasing doses of SNS01-T and bortezomib at a constant ratio of 1:1.25 for 48 hours. Cytotoxicity was measured by XTT, and synergy was determined using ComboSyn software. Mean  $\pm$  s.e.m. is shown ( $n=3$ ); single asterisk indicates  $P$  values  $< 0.05$  (One way ANOVA, Bonferroni post-test) compared to bortezomib. S, SNS01-T; B, bortezomib. (b) Western blot analysis of KAS-6/1 cells after treatment with either vehicle, SNS01-T (2  $\mu\text{g/mL}$ ), bortezomib (2.5  $\text{ng/mL}$ ), or a combination of SNS01-T and bortezomib for 48 hours. (c) Percentage of KAS-6/1 cells undergoing apoptosis after treatment with controls, SNS01-T (1.25  $\mu\text{g/mL}$ ), bortezomib (1.56  $\text{ng/mL}$ ), or a combination of the two at a ratio of 1:1.25 for 48 hours. Mean values ( $n=2$ ) are shown and are representative of two trials; asterisk indicates a  $P$  value  $< 0.05$ .

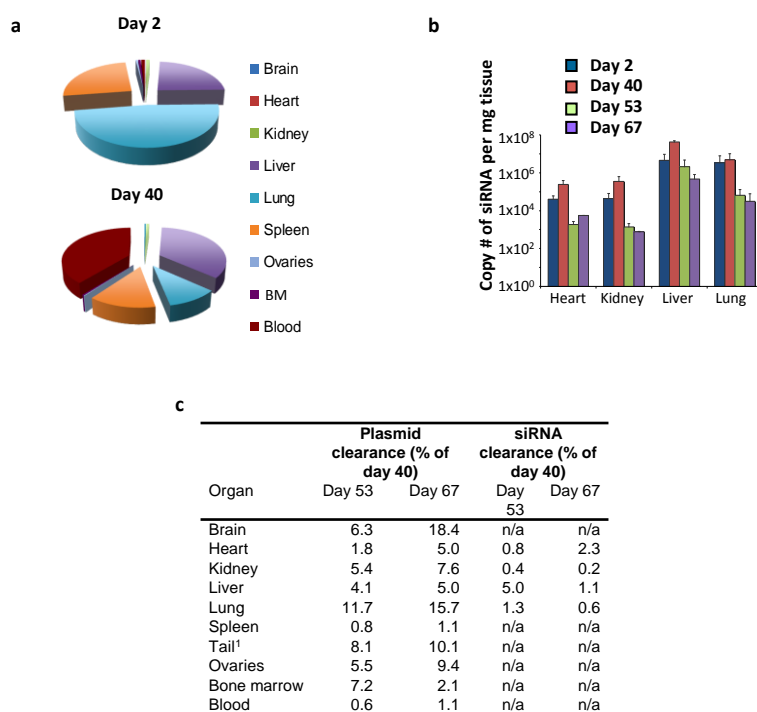

**Figure S3. Biodistribution of SNS01-T components in healthy female mice.** (a) Plasmid biodistribution in female mice after a single dose (day 2) or twelve doses (day 40) of SNS01-T. (b) Biodistribution of siRNA in various tissues from female mice after one dose (day 2), twelve doses (day 40), 2 weeks recovery post-treatment (day 53), or 4 weeks recovery post-treatment (day 67). Data indicate the mean  $\pm$  s.e.m. (c) Plasmid and siRNA clearance as a percentage of the quantity on day 40, based on the data in b and c. <sup>1</sup>, site of injection.

**Supplementary Tables****Table S1. Comparison of SNS01-T and SNS01-T-fluor.**

|                   | [Nucleic acid],<br>mg/mL | Zeta diameter, nm | Zeta potential, mV | Polydispersity<br>index |
|-------------------|--------------------------|-------------------|--------------------|-------------------------|
| SNS01-T           | 0.075                    | 72.84 +/- 1.6     | 36.1 +/- 0.7       | 0.208 +/-<br>0.008      |
| SNS01-T-<br>fluor | 0.075                    | 78.98 +/- 1.0     | 38.3 +/- 0.8       | 0.171 +/-<br>0.004      |

1 mL batches of SNS01-T and SNS01-T with FITC-conjugated plasmid and DY547-siRNA (SNS01-T-fluor) were compared using dynamic light scattering. Data shown are means +/- one standard deviation.

## Supplementary Information

**Table S2. Cytotoxicity of SNS01-T in B cell cancer cell lines.**

| Cell Line                | Multiple Myeloma |           |           |            |            | Mantle Cell Lymphoma |           |            | Diffuse Large B-Cell Lymphoma |           |            |
|--------------------------|------------------|-----------|-----------|------------|------------|----------------------|-----------|------------|-------------------------------|-----------|------------|
|                          | KAS-6/1          | U266      | RPMI 8226 | MM.1S      | MM.1R      | Z138                 | JEKO1     | JVM2       | Su-DHL6                       | Toledo    | Pfeiffer   |
| IC <sub>50</sub> , ng/μL | 7.27             | 3.56      | 4.06      | 6.32       | 9.25       | 5.06                 | 3.29      | 7.17       | 4.09                          | 5.17      | 12.57      |
| 95% CI                   | 5.56-9.51        | 3.23-3.93 | 3.50-4.71 | 2.48-10.16 | 6.97-11.53 | 3.83-6.66            | 2.48-4.36 | 4.98-10.33 | 3.37-5.00                     | 4.03-6.63 | 9.40-16.81 |

### Flow cytometry

KAS-6/1 cells were treated with controls, SNS01-T (1.25  $\mu\text{g}/\text{mL}$ ), bortezomib (1.56  $\text{ng}/\text{mL}$ ), or a combination of the two drugs at a ratio of 1:1.25 and incubated for 48 hours. The percentage of cells undergoing apoptosis was determined by staining the cells with Annexin V-FITC and propidium iodide according to the manufacturer's instructions (BD Biosciences). The percentage of annexin-positive and annexin/PI-positive cells was assessed on a FACSCalibur flow cytometer (BD Scientific)
